# Supplementary material for: A dry double-sided tape post-treated with tannic acid for long-term adhesion in a wet environment
Source: Royal Society of Chemistry journal article supplement (doi:10.1039/d4tb01111b), 2024-01-01
Supplement: d4tb01111b1.pdf [file d4tb01111b1.pdf]

## **Supporting Information**

### **A dry double-sided tape post-treated with tannic acid for long-term adhesion in wet environment**

**Yi Ju, Junjie Wang, Yang Lei\* and Yunbing Wang**

National Engineering Research Center for Biomaterials and College of Biomedical  
Engineering, Sichuan University, No. 29 Wangjiang Road, Chengdu 610065, China

\*Correspondence author at: National Engineering Research Center for Biomaterials  
and College of Biomedical Engineering, Sichuan University, No. 29 Wangjiang Road,  
Chengdu 610065, China. Tel: +86 28 85415280; Fax: +86 28 85410246; E-mail:  
leiyang@scu.edu.cn (Yang Lei)

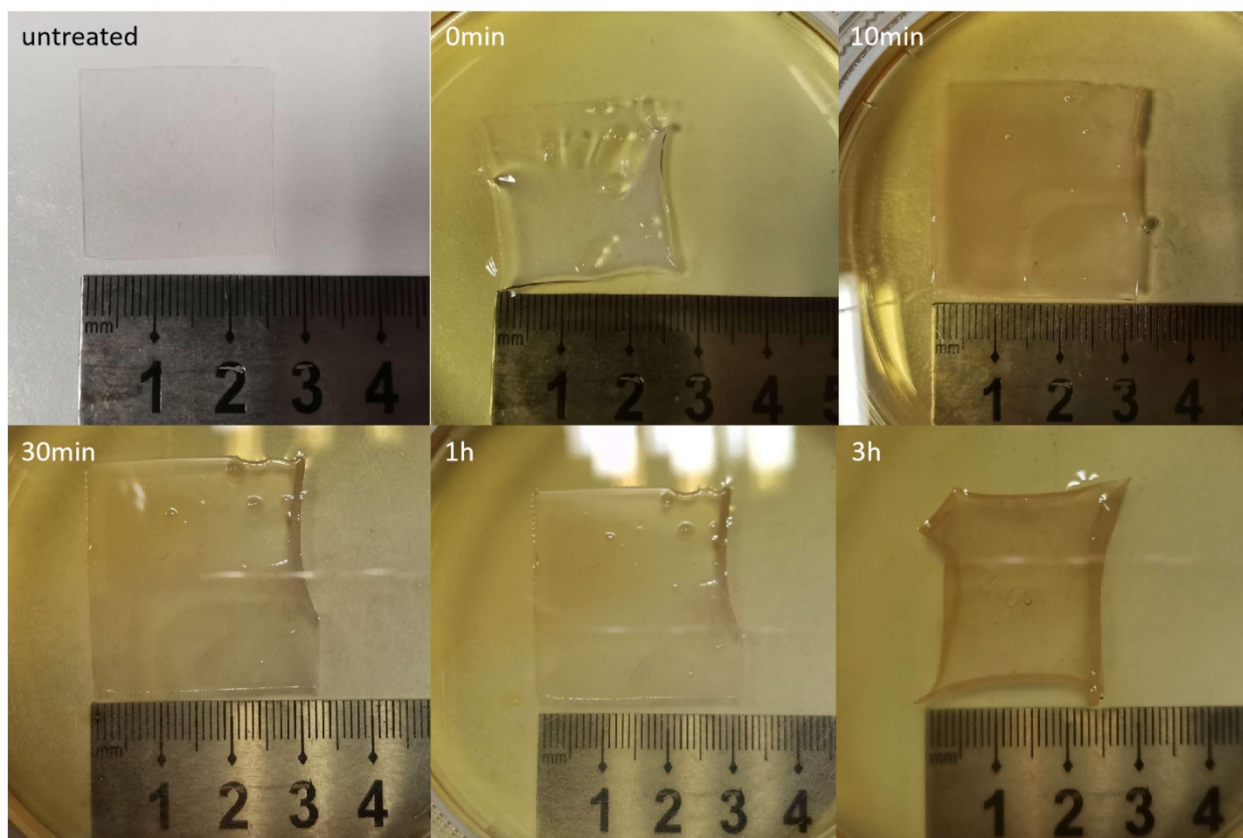

Figure S1. The optimization of TA's post-treatment time.

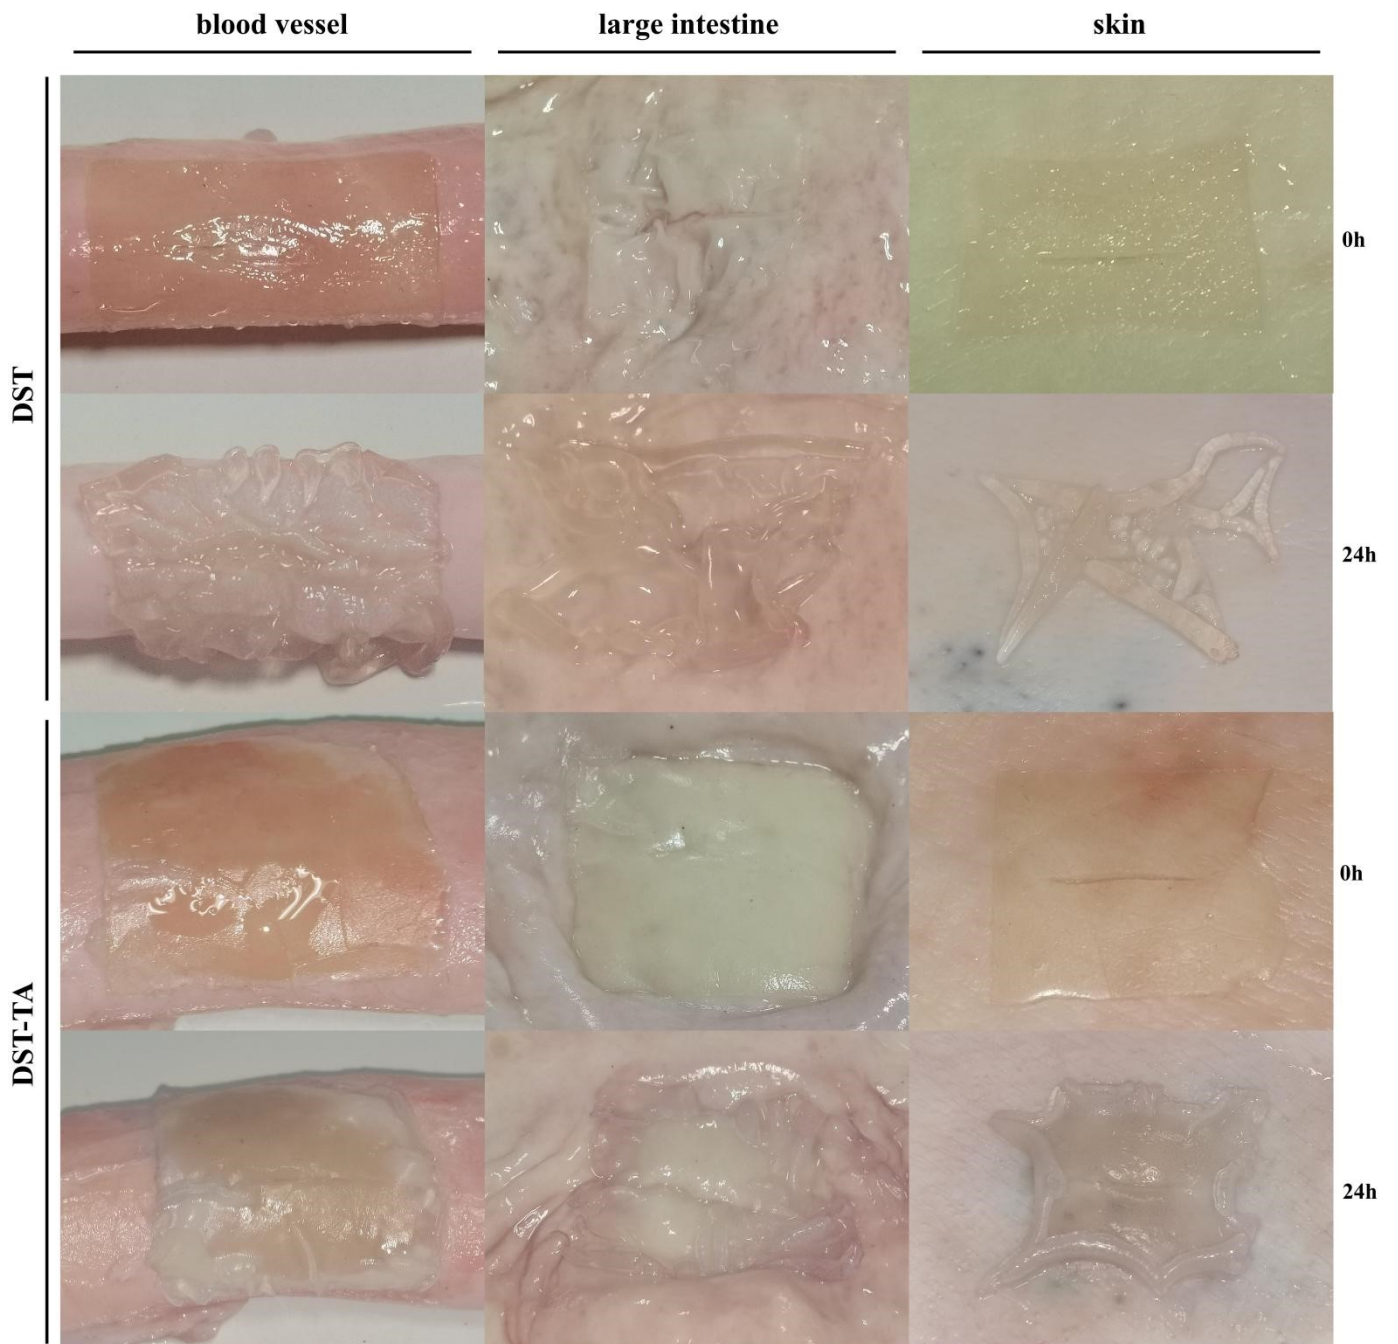

Figure S2. The adhesion and retention of DST and DST-TA on different tissues.

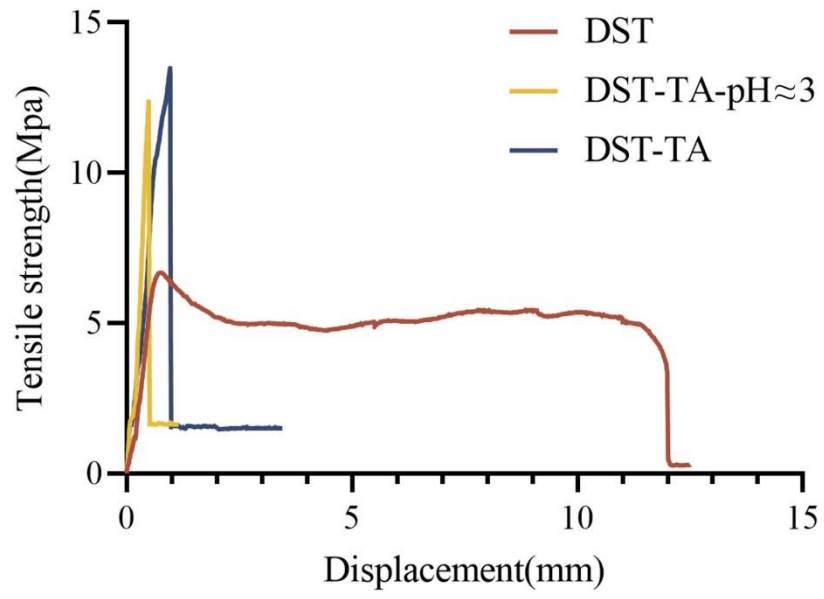

Figure S3. Stress-strain curves of three samples.

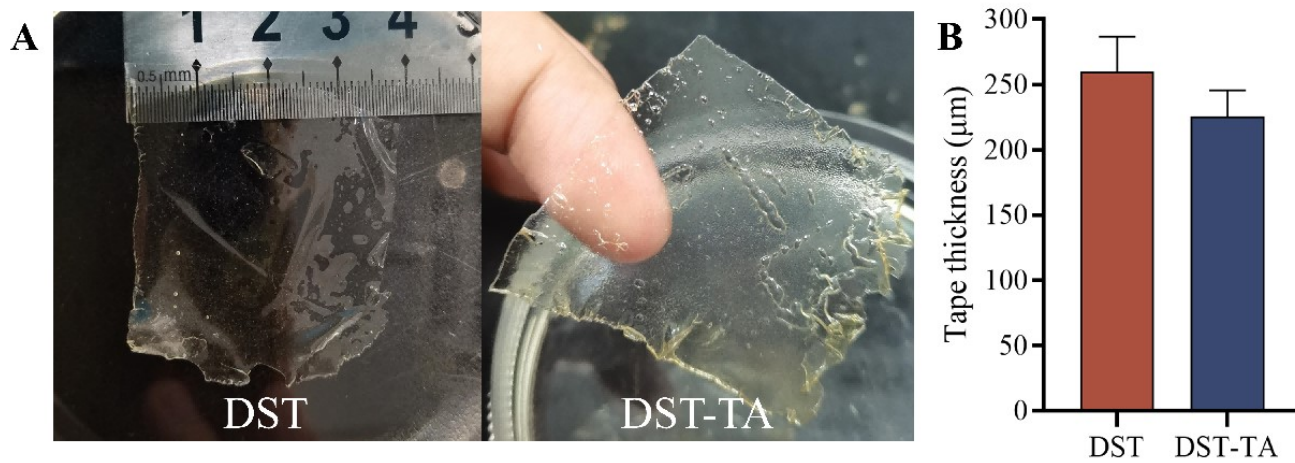

Figure S4. (A) DST and DST-TA in thin dry film state; (B) Thickness of tapes

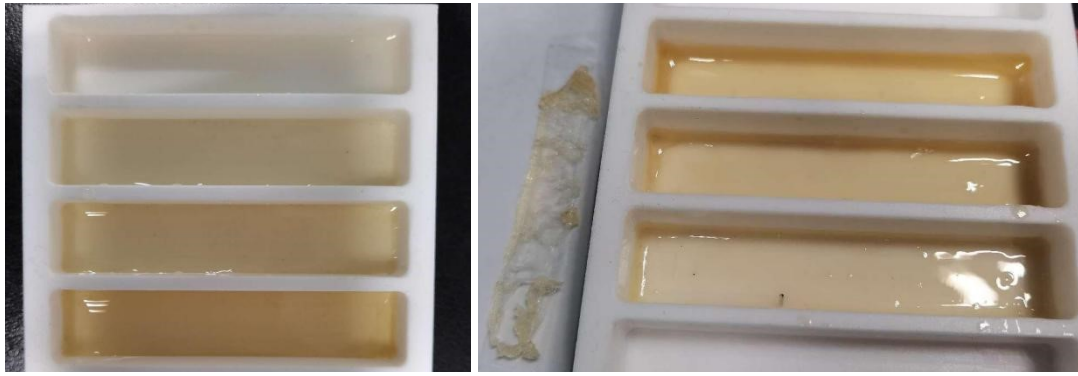

Figure S5. Tape that was blocked from polymerization by tannic acid in the pre-experiment

Supplementary Video 1

Leakage test of DST after soaking in saline for 24h.

Supplementary Video 2

Leakage test of DST-TA after soaking in saline for 24h.

Supplementary Video 3

Long-term adhesion test of DST in vitro

Supplementary Video 4

Long-term adhesion test of DST-TA in vitro
